# Supplementary material for: Non-Photochemical Quenching under Drought and Fluctuating Light
Source: MDPI journal article supplement (doi:10.3390/ijms23095182), 2022-05-06
Supplement: s1 [file s1]

Supplementary Materials:

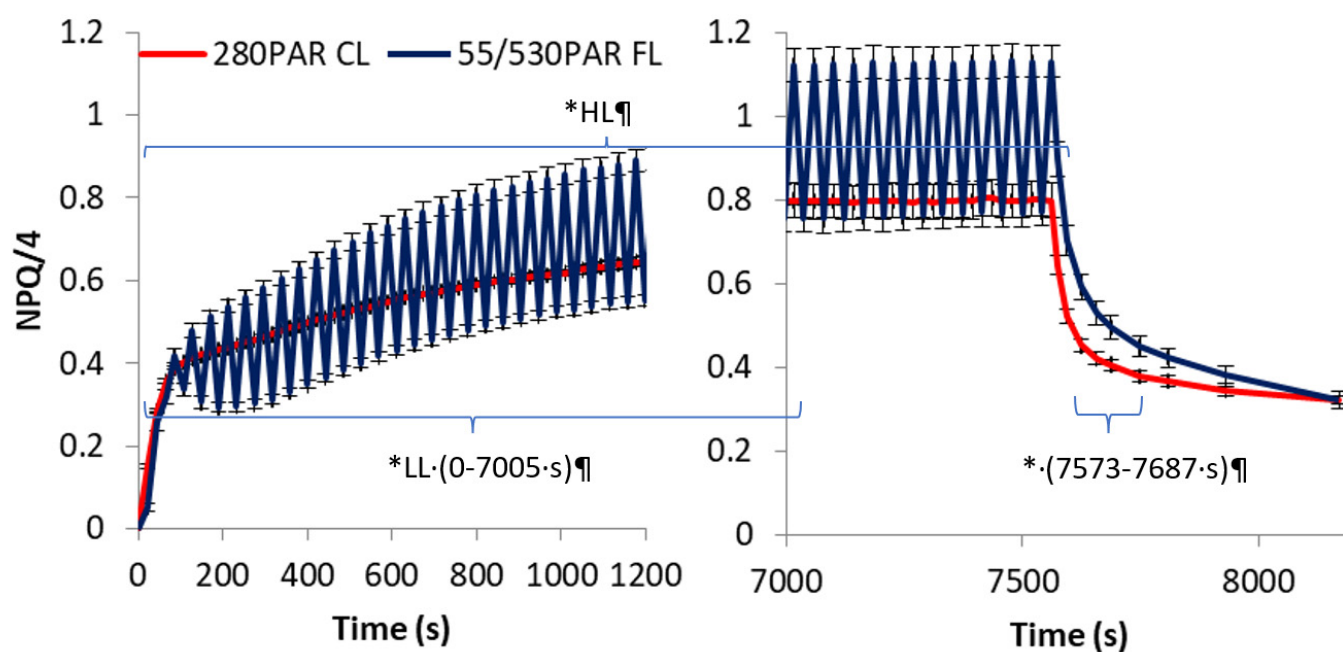

**Figure S1.** Non-photochemical quenching (NPQ) induced by  $280 \mu\text{mol m}^{-2}\text{s}^{-1}$  of constant light (280PAR CL) and fluctuating light (50/530 PAR FL) changing every 20 s from low ( $55 \mu\text{mol m}^{-2}\text{s}^{-1}$ ) to high ( $530 \mu\text{mol m}^{-2}\text{s}^{-1}$ ) intensity for 7562 s followed by a dark period. Data for the *At* WT grown in soil with optimum water availability. Means and standard errors are given ( $n=8$ ), \* indicates a statistical difference at  $p < 0.05$  between the HL or LL phase of fluctuating and constant light.
